# Supplementary material for: Spinal signatures of entrenched and treated neuropathic pain
Source: Research Square preprint supplement (doi:10.21203/rs.3.rs-4796294/v1), 2024-10-11
Supplement: Supplementary file 1 [file 0839087c58ada858905a393c.xlsx]

## Sheet: Sheet1
VISIUM ID	Age	Sex	Ethnicity	COD	Medical History
SC2 & SC6	57	F	Black	CVA / Stroke	HTN, previous stroke; CAD; significant smoking history.
SC4 & SC8	36	M	Black	Head Trauma / GSW	History of cocaine, acid and marijuana abuse (only majiruana at time of admission); Asthma as a child; no other significant medical history.
